# Supplementary material
Source: PubMed Central journal article supplement (PMC2865216)
Supplement: Supp_Fig.pdf [file Supp_Fig.pdf]

mgkktkrtad ssssedeeey vvekvldrrv vkgqveyllk wkgfseeht wepeknldcp  
elisefmkky kkmvkvqpcp sesdiiteed kskkkqgeek qpkkqpkkde egqkeedkpr  
kepdkkegk eveskrknl ktgvtstsd eeegddqege kkrkggrnfq tahrnmlkg  
qhekeaadrk rkqeeqmete qqnkdegkqp evkkvekkre tsmdsrlqri haeiknslki  
dnldvnrcie aldelaslqv tmqqaqkhte mittlkkirr fkvsqvimek stmlynkfk  
mflvgegdsv itqvlksla eqrqheeank tkdggkkgpn kklekeqtgs ktlnggsdaq  
dgnqpqhng snedskdnhe astkkkpsse ereteislkd stldn

**SUPPLEMENTARY FIG. 1.** Sequence of the TIHPLE protein.
